# Supplementary material for: Graph-based analysis of H-bond networks and unsupervised learning reveal conformational coupling in prion peptide segments
Source: Royal Society of Chemistry journal article supplement (doi:10.1039/d4cp02123a), 2024-09-10
Supplement: d4cp02123a1.pdf [file d4cp02123a1.pdf]

## Supporting information for: Graph-based analyses of H-bond networks and unsupervised learning reveal conformational coupling in prion peptide segments

Wycliffe Omwansu, Robinson Musembi, and Solomon Derese

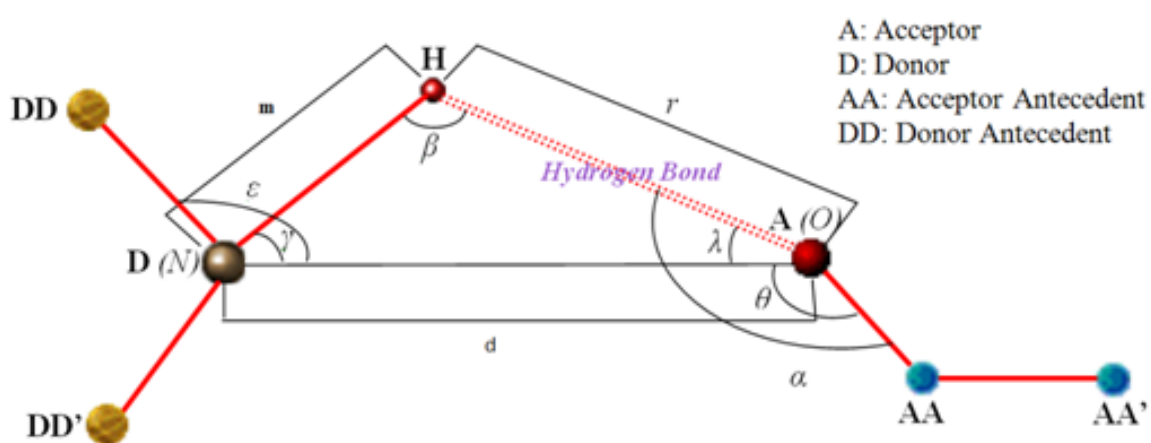

Figure S1: Hydrogen-bond geometric definition criteria. H-bond is formed when:  $r \leq 0.25nm$ ,  $\beta \geq 150^\circ$ ; and when  $d \leq 0.35nm$ ,  $\gamma \leq 35^\circ$ .

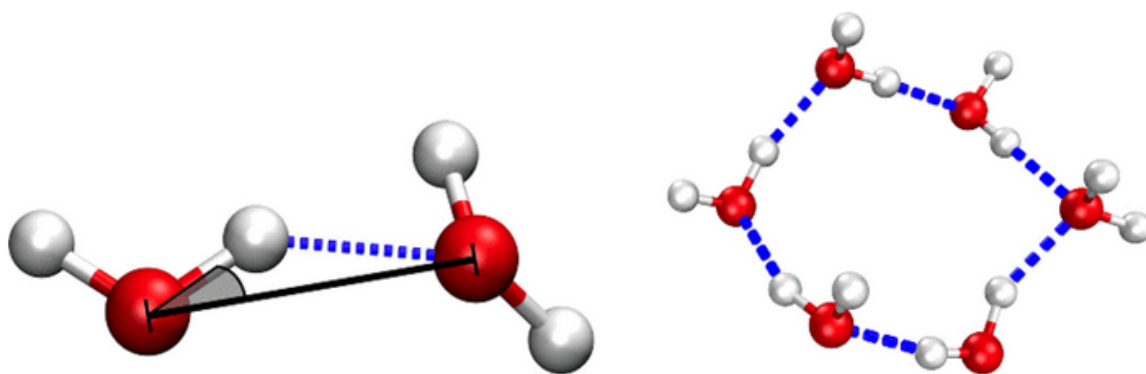

Figure S2: Geometric definition of a hydrogen bond, and a loop of six hydrogen-bonded water molecules.

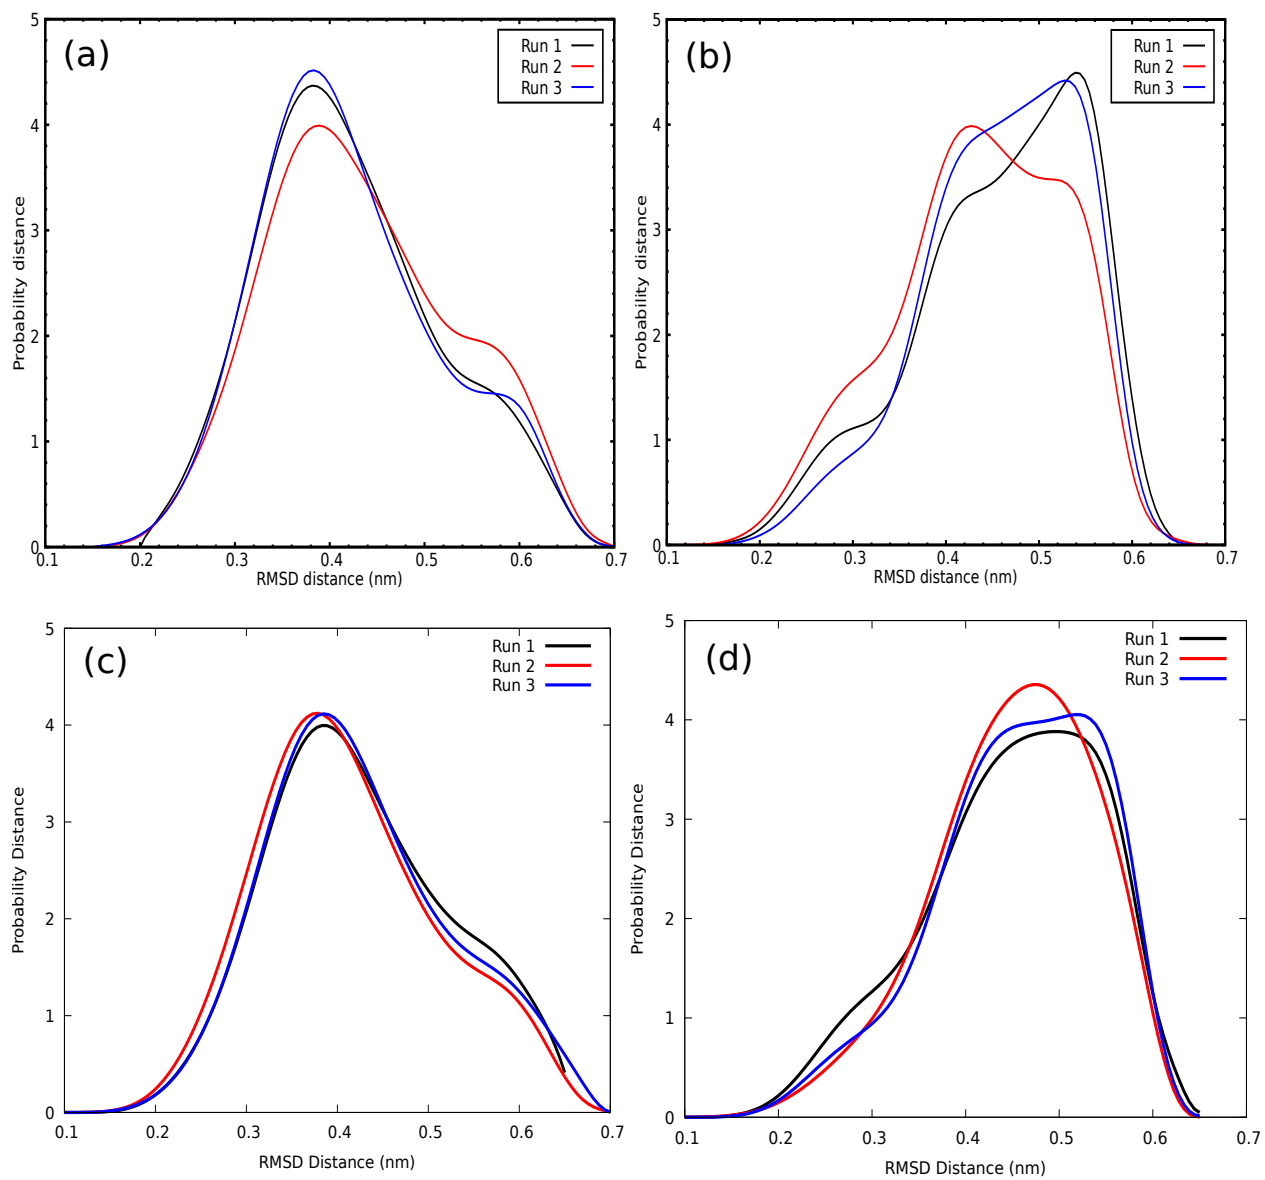

Figure S3: Three independent runs of RMSD probability distribution plots for G127/M129 (a), V127/V129 (b), G127/V129 (c) and V127/M129 (d).

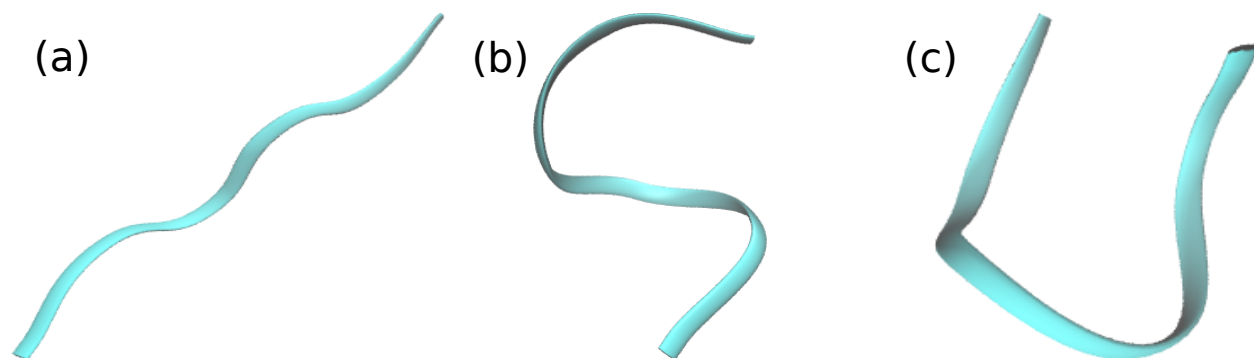

Figure S4: The three dominant clusters found in the four systems. The open or unfolded state is represented by (a), while the partially-folded (or S-shaped conformation) and the folded (or U-shaped conformation) are shown in b and c, respectively.

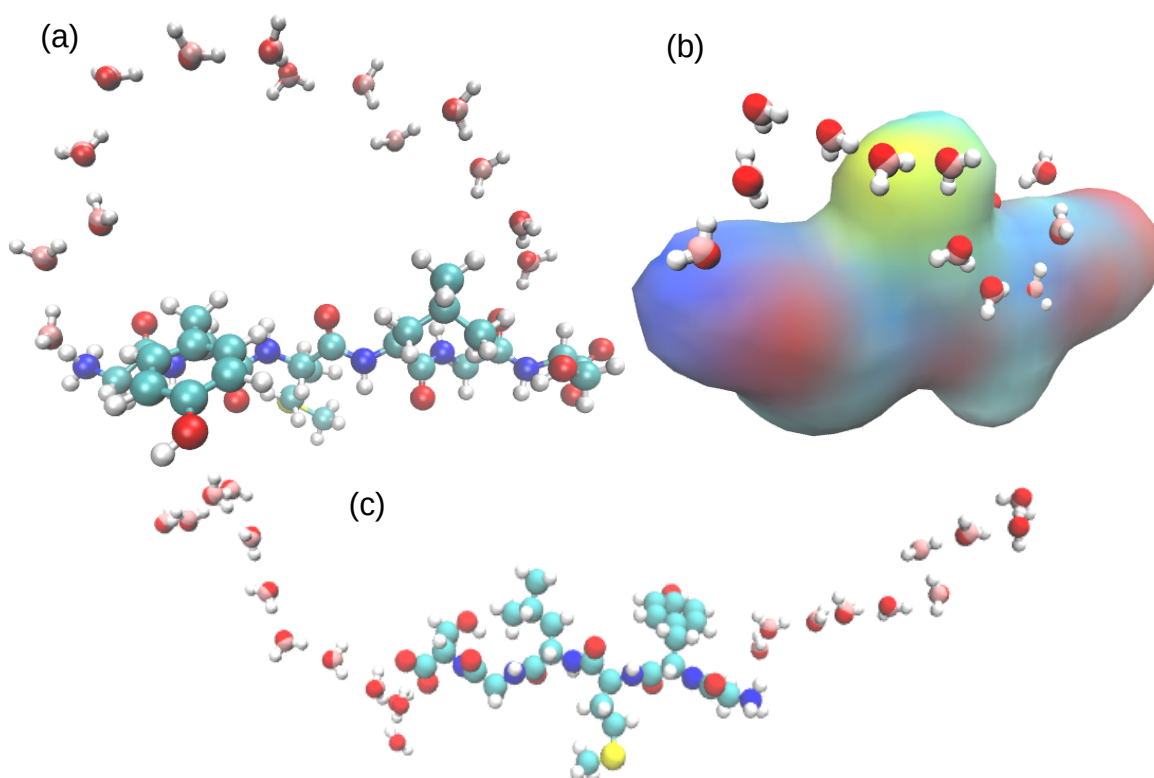

Figure S5: Water wire path lengths around peptides illustrating H-bond networks in the vicinity of peptide structures. The water wire path lengths provide insights into the solvation dynamics and hydrogen bonding patterns involved in peptide-water interactions.

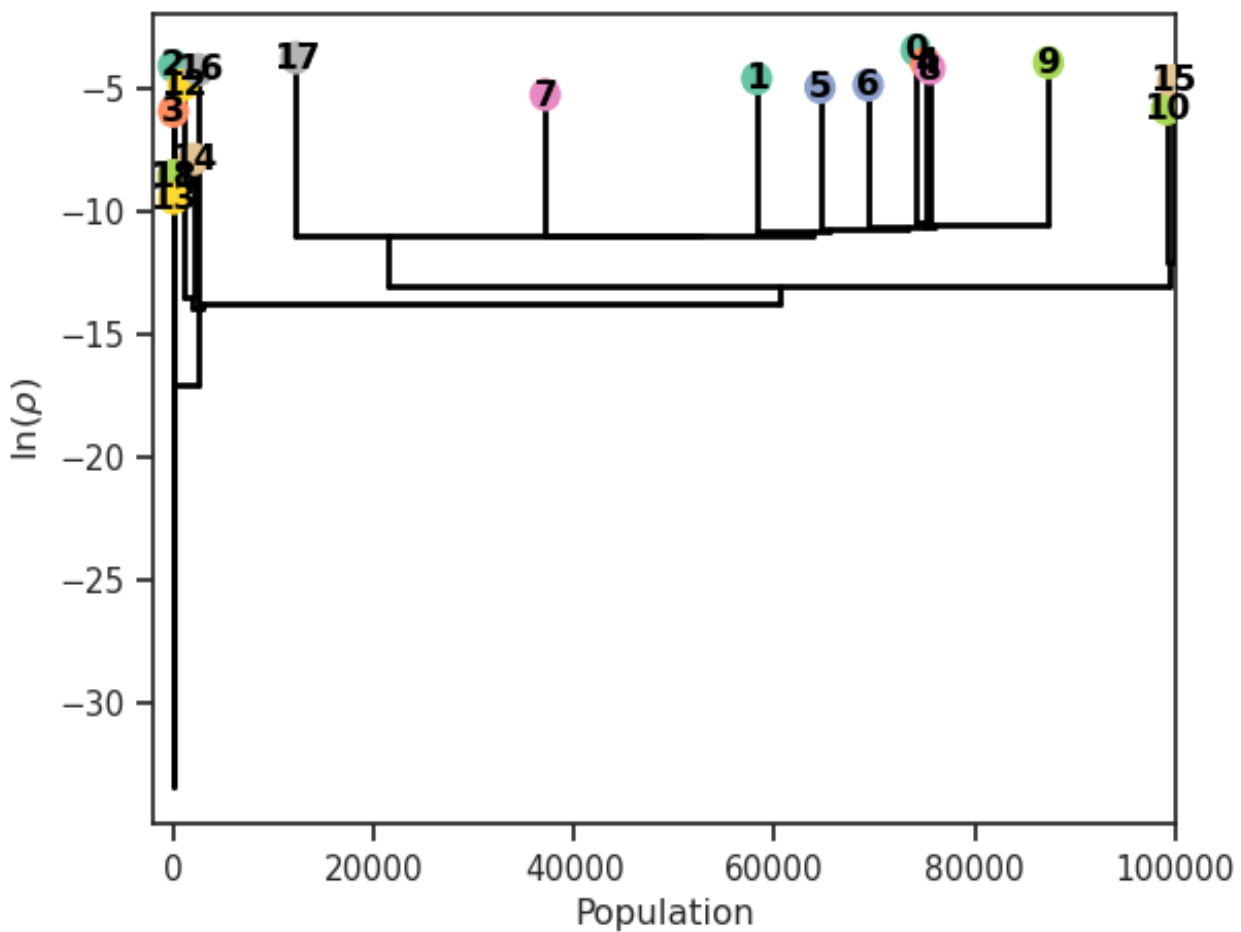

Figure S6: Dendrogram representation illustrating a rough free energy landscape. The various conformations of the cluster center structures are depicted adjacent to their corresponding density peaks.

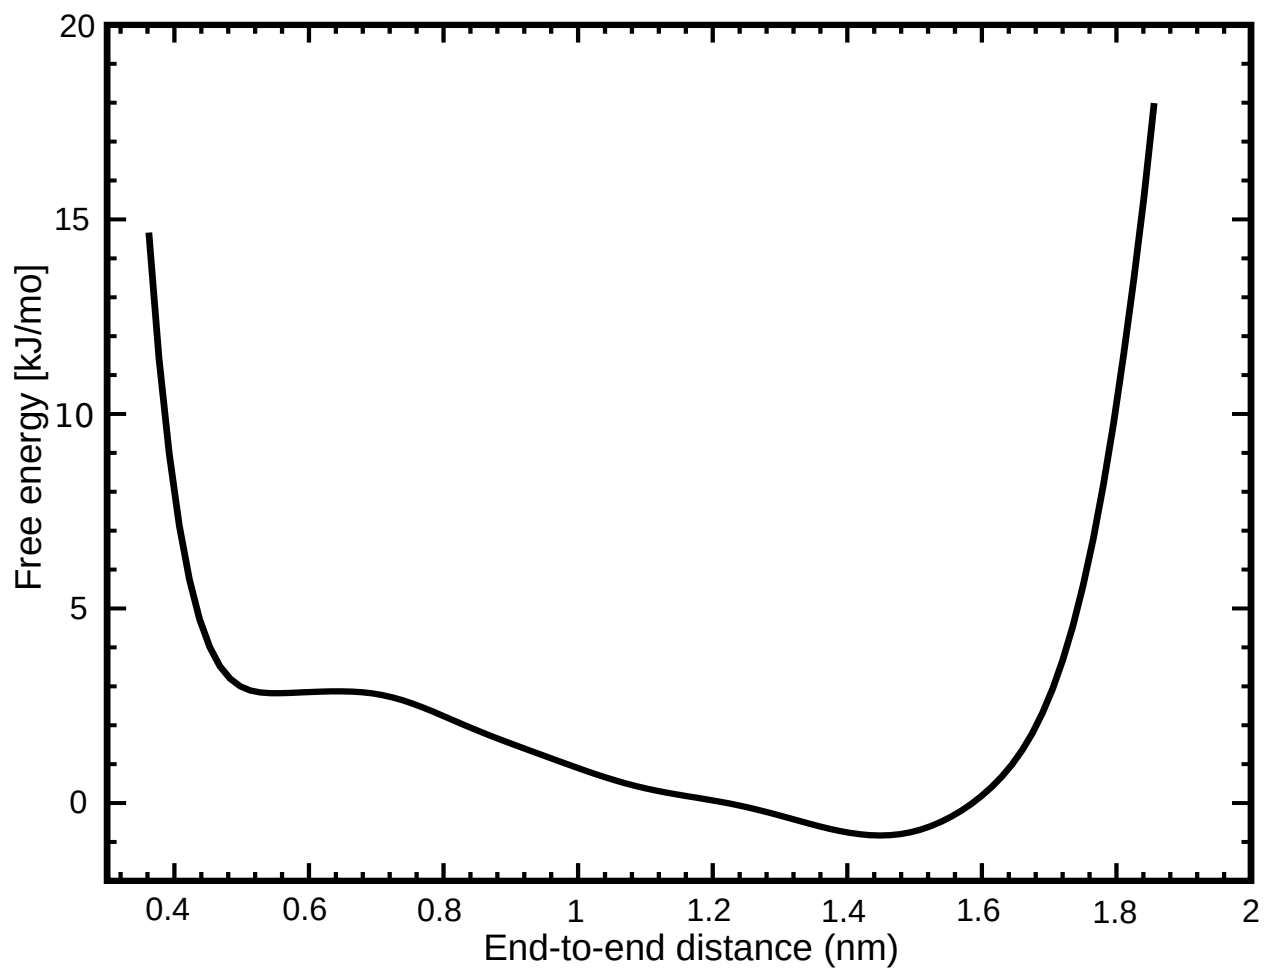

Figure S7: One-dimensional free energy landscape of G127/M129 peptide using end-to -end distance as a collective variable.

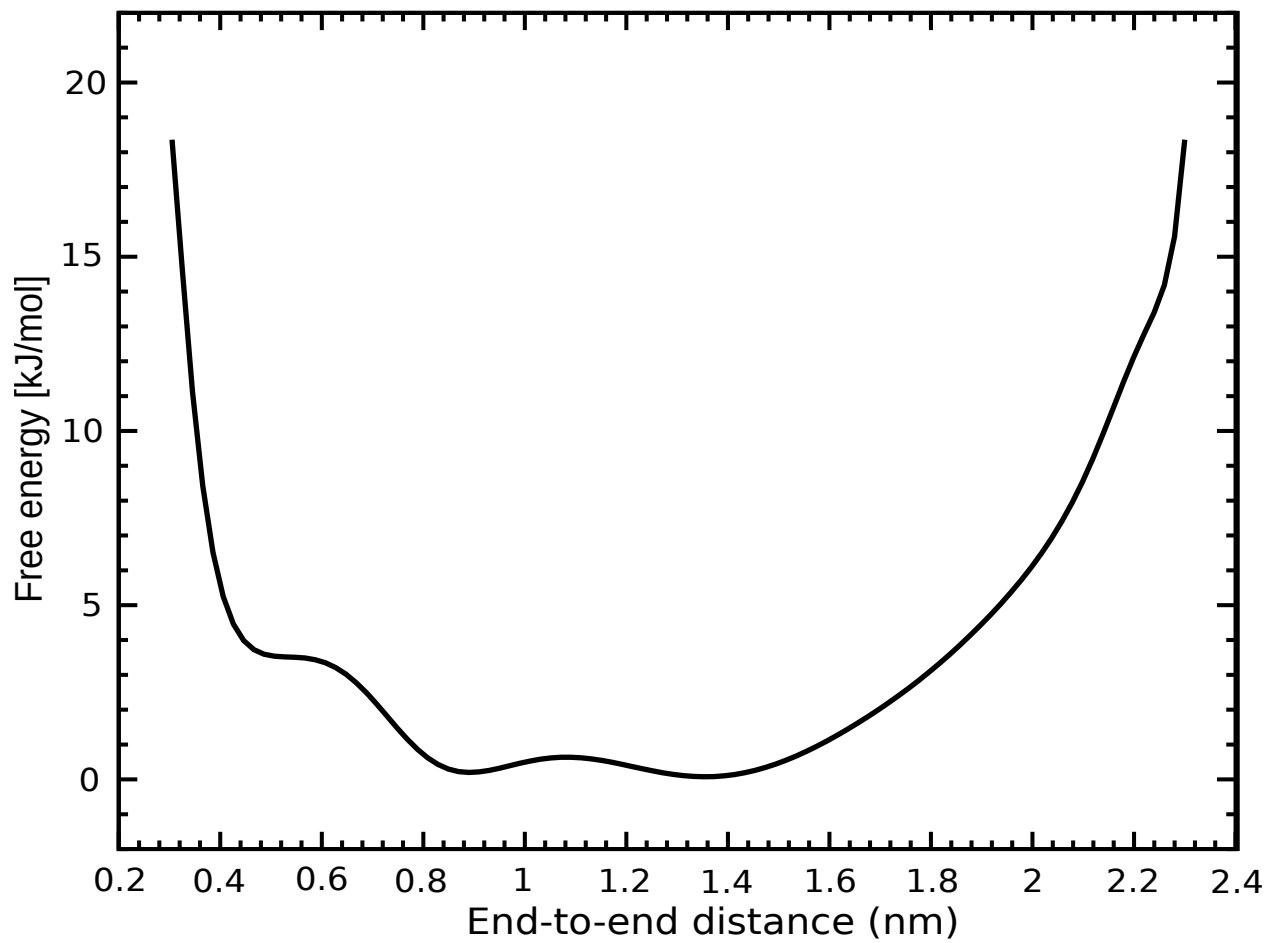

Figure S8: One-dimensional free energy landscape of V127/V129 peptide using end-to -end distance as a collective variable.

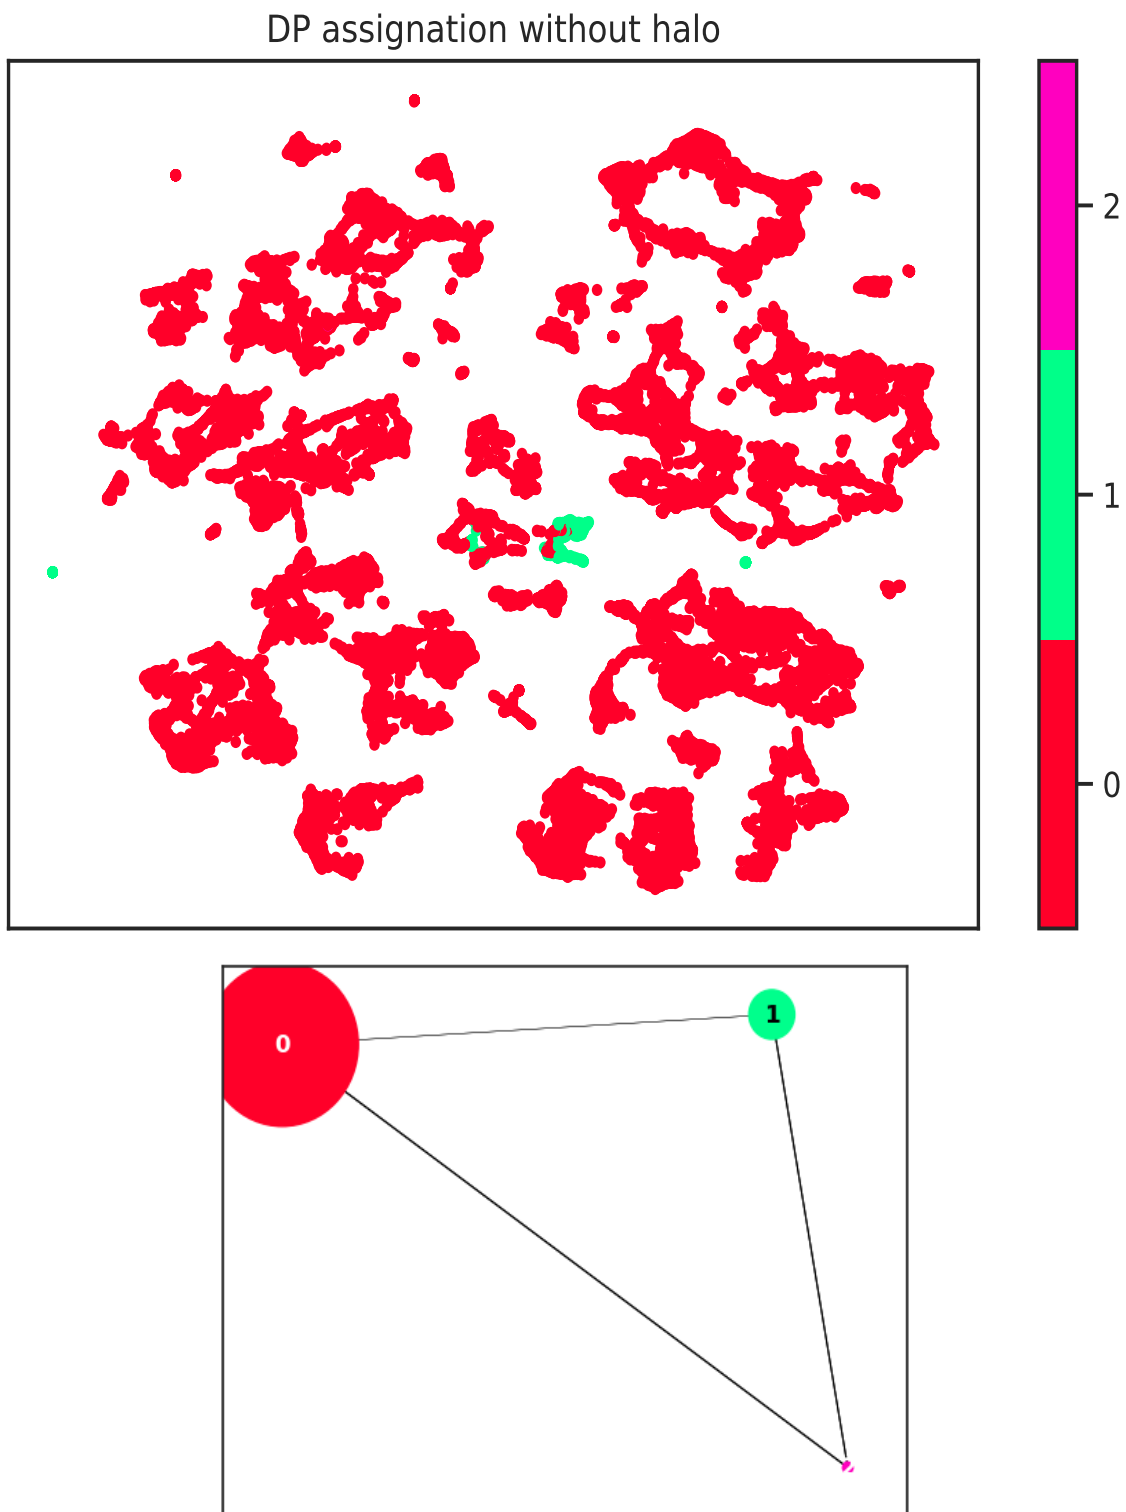

Figure S9: Plot of the DP clustering assignation showing distribution of clusters on a decision graph for G127/MET129 peptide (upper panel), and a 2D multidimensional scaling projection showing similarity relationships among clusters.

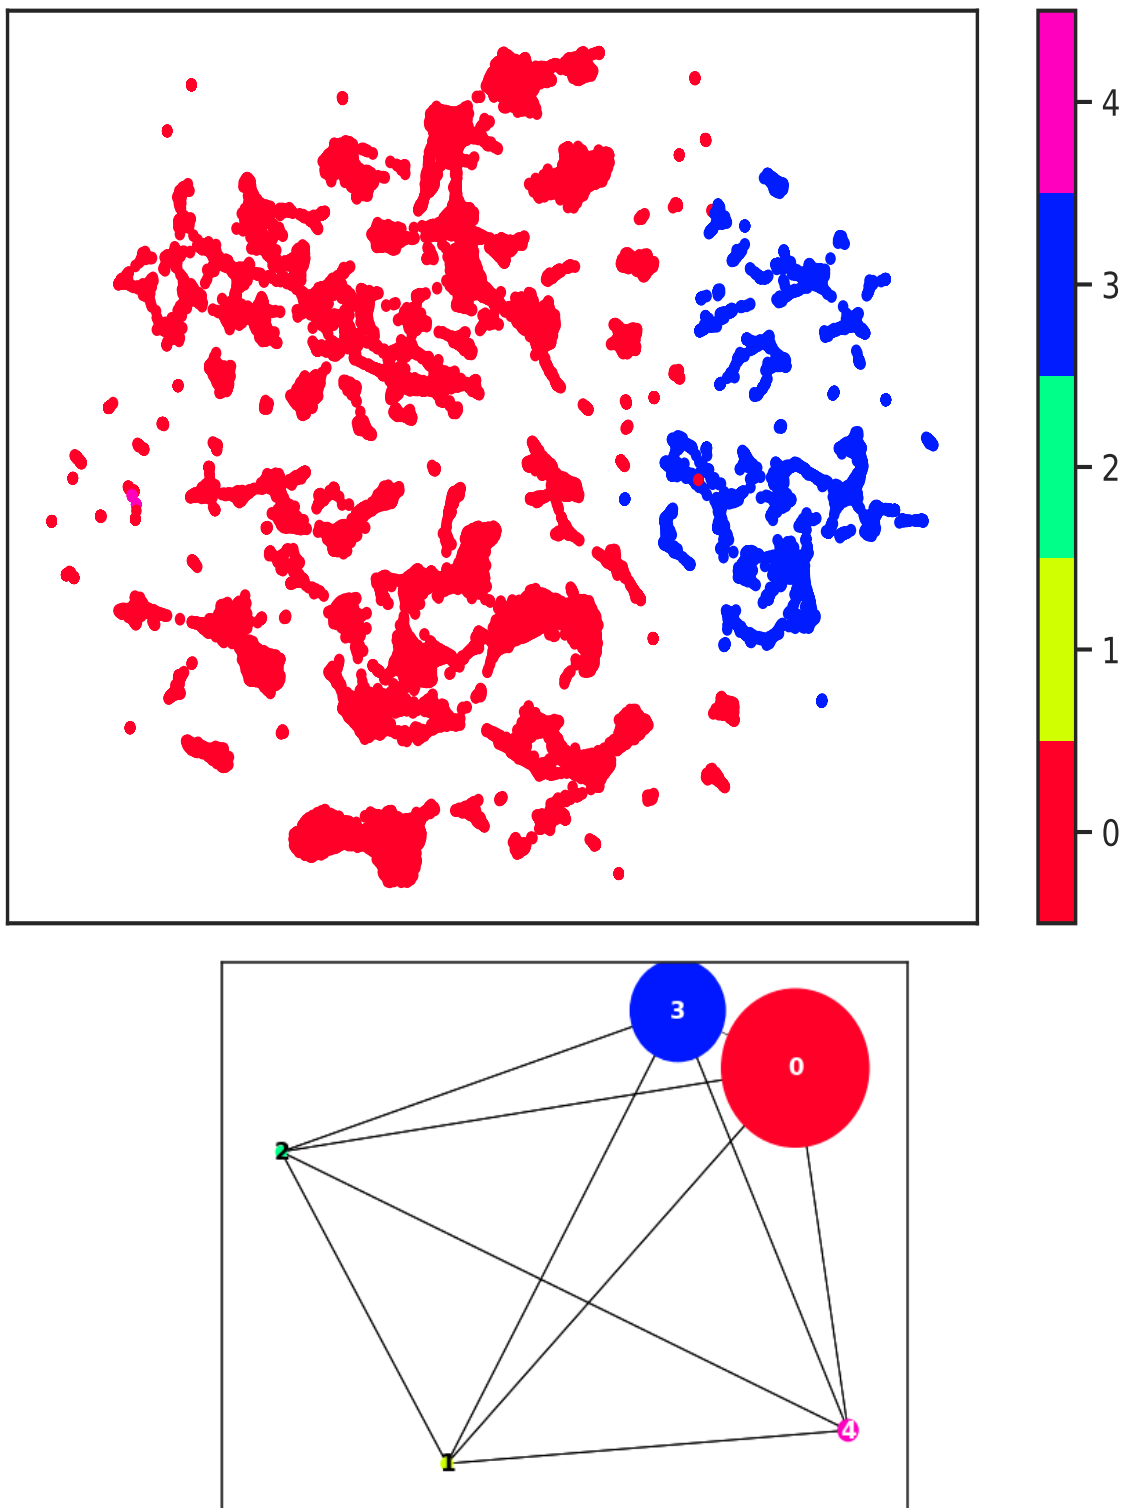

Figure S10: Plot of the DP clustering assignment showing distribution of clusters on a decision graph for V127/VAL129 peptide (upper panel), and a 2D multidimensional scaling projection showing similarity relationships among clusters.
